# Supplementary material
Source: Research Square preprint supplement (doi:10.21203/rs.3.rs-9569016/v1)
Supplement: Supplementary file 1 [file 22e477274038c7f4cf9f7eae.docx]

**Consortium Authorship**

| **Full Name** | **Banner group** | **Affiliation(s)** |
| --- | --- | --- |
| Christopher Alexakis | NIHR IBD BioResource | Royal Surrey County Hospital, Guildford GU2 7XX, UK |
| Rebecca Ali | NIHR IBD BioResource | Bronglais Hospital, Aberystwyth SY23 1ER, UK |
| Mohammed Allah-Ditta | NIHR IBD BioResource | Huddersfield Royal Infirmary, Huddersfield HD3 3EA |
| Nikolas Apostolou | NIHR IBD BioResource | Ormskirk and District General Hospital, Ormskirk L39 2AZ, UK |
| Richard Appleby | NIHR IBD BioResource | West Middlesex University Hospital, Isleworth, TW7 6AF, UK |
| James Ashton | NIHR IBD BioResource | University of Southampton, and Southampton Children's Hospital, Southampton, UK |
| Bijay Baburajan | NIHR IBD BioResource | Maidstone and Tunbridge Wells NHS Trust, Maidstone Hospital, Maidstone ME16 9QQ, UK |
| Evelyn Baker | NIHR IBD BioResource | Royal Gwent Hospital, Newport NP20 2UB, UK |
| Michelle Baker-Moffatt | NIHR IBD BioResource | Queen Alexandra Hospital, Portsmouth PO6 3LY, UK |
| Tyara Banerjee | NIHR IBD BioResource | West Suffolk NHS Foundation Trust, Bury St Edmunds IP332QZ, UK |
| Paul Banim | NIHR IBD BioResource | James Paget University Hospital NHS Foundation Trust, Great Yarmouth, NR31 6LA, UK |
| Ian Beales | NIHR IBD BioResource | Norfolk and Norwich University Hospital, Norwich NR4 7UY, UK |
| John Beckly | NIHR IBD BioResource | Royal Cornwall Hospital, Treliske, Truro, Cornwall, TR1 3LQ, UK |
| Klaartje Bel Kok | NIHR IBD BioResource | Queen Mary University, Innovation Centre, London , E1 2EF, UK |
| Andrew Bell | NIHR IBD BioResource | Weston General Hospital, Weston-super-Mare BS23 4TQ, UK |
| James Berrill | NIHR IBD BioResource | Royal Glamorgan Hospital, Pontyclun CF72 8XR, UK |
| Roisin Bevan | NIHR IBD BioResource | NorthTees & Hartlepool NHS Trust, University Hospital of North Tees, Stockton-on-Tees, TS19 8PE, UK |
| Stuart Bloom | NIHR IBD BioResource | University College London Hospitals NHS Foundation Trust, London. NW1 2PG, UK |
| Monica Bose | NIHR IBD BioResource | The Princess Alexandra Hospital NHS Trust, Harlow, CM20 1QX |
| John Bradley | NIHR IBD BioResource | New Cross Hospital of The Royal Wolverhampton NHS Trust, Wolverhampton, WV10 0QP, UK |
| Carolyn Brechin | NIHR IBD BioResource | NIHR BioResource, Cambridge University Hospitals NHS Foundation, Cambridge Biomedical Campus, Cambridge CB2 0QQ, UK |
| Biljana Brezina | NIHR IBD BioResource | Department of Gastroenterology, Cambridge University Hospitals NHS Foundation Trust, Cambridge CB2 0QQ, UK |
| Johanne Brooks | NIHR IBD BioResource | Lister Hospital, Stevenage SG1 4AB, UK |
| Deborah Butcher | NIHR IBD BioResource | Peterborough City Hospital, Peterborough PE3 9GZ, UK |
| Jeffrey Butterworth | NIHR IBD BioResource | ROYAL SHREWSBURY HOSPITAL, SHREWSBURY, SHROPSHIRE, SY3 8XQ, UK |
| Melanie Caswell | NIHR IBD BioResource | Blackpool Victoria Hospital, Blackpool FY3 8NR, UK |
| Monica Chan | NIHR IBD BioResource | North Devon District Hospital, Barnstaple EX31 4JB, UK |
| Annika Charlesworth | NIHR IBD BioResource | University Hospital Lewisham, London SE13 6LH, UK |
| Katie Clark | NIHR IBD BioResource | Whistion Hospital, Prescot L35 5DR, UK |
| Laura Cocking | NIHR IBD BioResource | NIHR BioResource, Cambridge University Hospitals NHS Foundation, Cambridge Biomedical Campus, Cambridge CB2 0QQ, UK |
| Andrew Cole | NIHR IBD BioResource | Derby Hospitals NHS Foundation Trust, Royal Derby Hospital, Derby, DE22 3NE, UK |
| Joseph Collum | NIHR IBD BioResource | Royal Blackburn Hospital, Blackburn BB2 3HH, UK |
| Rachel Cooney | NIHR IBD BioResource | Queen Elizabeth Hospital, Birmingham B15 2GW, UK |
| Nicholas Croft | NIHR IBD BioResource | The Royal London Children's Hospital, London E1 1FR, UK |
| Fraser Cummings | NIHR IBD BioResource | Southampton General Hospital, Southampton, SO166YD, UK |
| Albert Davies | NIHR IBD BioResource | Furness General Hospital, Barrow in Furness, Cumbria, LA14 4LF, UK |
| Tina Day | NIHR IBD BioResource | St Mary's Hospital, London W2 1NY, UK |
| Tina Day | NIHR IBD BioResource | St Mary's Hospital, London W2 1NY, UK |
| Juan de la Revilla Negro | NIHR IBD BioResource | Cambridge University Hospitals NHS Foundation Trust, Cambridge CB2 0QQ, UK |
| Aminda De silva | NIHR IBD BioResource | Royal Berkshire NHS Foundation Trust Royal Berkshire Hospital, Reading RG1 5AN, UK |
| John DeCaestecker | NIHR IBD BioResource | Leicester General Hospital, Leicester LE5 4PW, UK |
| Joanne Del Buono | UK IBDGC | School of Life Sciences, University of Nottingham, University Park, Nottingham, UK |
| Rofaida Desoki | NIHR IBD BioResource | MRC Epidemiology Unit, Cambridge CB2 0SL, UK |
| Anjan Dhar | NIHR IBD BioResource | Centre for Clinical Research & Innovation, Darlington Memorial Hospital, Darlington Co Durham, DL3 6HX, UK |
| Stacey Duffy | NIHR IBD BioResource | North Tyneside General Hospital, North Shields NE29 8NH, UK |
| Dharmaraj Durai | NIHR IBD BioResource | University Hospital of Wales, Cardiff CF14 4XW, UK |
| Stephen Foley | NIHR IBD BioResource | Kings Mill Hospital, Sutton in Ashfield, NG174JL, UK |
| Marco Gasparetto | NIHR IBD BioResource | Norfolk and Norwich University Hospitals, Jenny Lind Children's Hospital, Norwich NR4 7UY, United Kingdom; University of East Anglia, Norwich Medical School, Faculty of Medicine and Health Science, Norwich NR4 7TJ, United Kingdom |
| Michael Grimes | NIHR IBD BioResource | Kingston Hospital, Kingston upon Thames KT2 7QB, UK |
| Anton Gunasekera | NIHR IBD BioResource | St Peters Hospital, Chertsey KT16 0PZ, UK |
| Laura Hancock | NIHR IBD BioResource | Wythenshawe Hospital, Manchester, M23 9LT, UK |
| Chris Hawkey | UK IBDGC | STAR (Simple Trials for Academic Research) Unit, School of Medicine, University of Nottingham, Nottingham, UK |
| Virginia Hay | NIHR IBD BioResource | Broomfield Hospital, Chelmsford CM1 7ET, UK |
| Rob Heuschkel | NIHR IBD BioResource | Addenbrooke's Hospital & University Cambridge, Cambridge CB2 0QQ, UK |
| David Hobday | NIHR IBD BioResource | Sunderland Royal Hospital, Sunderland, SR4 7TP, UK |
| Jennifer Hollis | UK IBDGC | Nuffield Department of Clinical Medicine, University of Oxford, Oxford, UK; |
| Patricia Hooper | NIHR IBD BioResource | Leicester General Hospital, Leicester LE5 4PW, UK |
| Sami Hoque | NIHR IBD BioResource | Whipps Cross University Hospital, London E11 1NR |
| Becky Icke | NIHR IBD BioResource | Glangwili General Hospital, Carmarthen SA31 2AF, UK |
| Peter Irving | NIHR IBD BioResource | Department of Gastroenterology, Guy's & St. Thomas' Hospitals NHS Foundation Trust, London SE1 7EH, UK |
| Wisam Jafar | NIHR IBD BioResource | Stepping Hill Hospital, Stockport SK2 7JE, UK |
| Mark Jarvis | NIHR IBD BioResource | Basildon Hospital, Nethermayne , Basildon , Essex, SS16 5NL, UK |
| Babur Javaid | NIHR IBD BioResource | Bedford Hospital NHS Trust, King’s Place, Bedford, MK42 9DJ, UK |
| Gbemisola Jenfa | NIHR IBD BioResource | Hinchingbrooke Hospital, Huntingdon PE29 6NT, UK |
| Kerrie Johns | NIHR IBD BioResource | Withybush Hospital, Haverfordwest SA61 2PZ, UK |
| Matthew Johnson | NIHR IBD BioResource | Gastroenterology Department, Luton and Dunstable University Hospital NHS Foundation Trust, Luton LU4 0DZ, UK |
| Emma Johnston | NIHR IBD BioResource | West Middlesex University Hospital, Isleworth, TW7 6AF, UK |
| Marie Jones | NIHR IBD BioResource | Singleton Hospital, Swansea SA2 8QA, UK |
| Kelsey Jones | NIHR IBD BioResource | Great Ormond Street Hospital, London WC1N 3JH, UK |
| Lijo Joy | NIHR IBD BioResource | Royal Albert & Edward Infirmary, Wrightington, Wigan & Leigh NHS Foundation Trust, Wigan, WN1 2NN, UK |
| Jochen Kammermeier | NIHR IBD BioResource | Evelina Hospital, London SE1 7EH, UK |
| Akshay Kapoor | NIHR IBD BioResource | Sheffield Children’s Hospital, Sheffield S10 2TH, UK |
| Cheryl Kemp | NIHR IBD BioResource | Watford General Hospital, Watford WD18 0HB, UK |
| Alexandra J. Kent | NIHR IBD BioResource | King’s College Hospital NHS Foundation Trust, Denmark Hill, SE5 9RS, London, UK |
| Nathalie Kingston | NIHR IBD BioResource | NIHR BioResource, Cambridge University Hospitals NHS Foundation, Cambridge Biomedical Campus, Cambridge CB2 0QQ, UK |
| Hannah Knight | NIHR IBD BioResource | NIHR BioResource, Cambridge University Hospitals NHS Foundation, Cambridge Biomedical Campus, Cambridge CB2 0QQ, UK |
| Konrad Koss | NIHR IBD BioResource | Macclesfield District General Hospital, Macclesfield SK10 3BL, UK |
| Ioannis Koumoutsos | NIHR IBD BioResource | Southend University Hospital, Westcliff-on-Sea SS0 0RY, UK |
| Nicola Lancaster | NIHR IBD BioResource | Barnsley General Hospital, Barnsley S75 2EP, UK |
| Jacinta Lee | NIHR IBD BioResource | NIHR BioResource, Cambridge University Hospitals NHS Foundation, Cambridge Biomedical Campus, Cambridge CB2 0QQ, UK |
| Kwang Lee | NIHR IBD BioResource | Bristol Children’s Hospital, Bristol BS2 8BJ, UK |
| Stephen Lewis | NIHR IBD BioResource | Derriford Hospital, Plymouth PL6 8DH, UK |
| Wendy Lewis | NIHR IBD BioResource | Plymouth NHS Trust, Level 7, Derriford Hospital, Plymouth, PL6 8DH |
| Andy Li | NIHR IBD BioResource | Worthing Hospital, Western Sussex Hospitals NHS Foundation Trust, Worthing Bn11 2DH, UK |
| Jimmy K. Limdi | NIHR IBD BioResource | Fairfield General Hospital, Bury, BL9 7TD, UK |
| Alan Lobo | NIHR IBD BioResource | Inflammatory Bowel Disease Centre, Sheffield Teaching Hospitals, Sheffield S10 2JF, UK |
| Christopher Macdonald | NIHR IBD BioResource | North Cumbria University Hospitals NHS Trust, Carlisle, CA2 7HY, UK |
| George Macfaul | NIHR IBD BioResource | Milton Keynes University Hospital, Standing Way, , Eaglestone, Milton Keynes, MK6 5LD, UK |
| Asif Mahmood | NIHR IBD BioResource | St Helier Hospital, Carshalton SM5 1AA, UK |
| John Mansfield | NIHR IBD BioResource | Translational and Clinical Research Institute, Newcastle University, Newcastle upon Tyne, NE2 4HH, UK; Department of Gastroenterology, Newcastle upon Tyne Hospitals NHS Foundation Trust, Newcastle upon Tyne, NE1 4LP, UK |
| Dina Mansour | NIHR IBD BioResource | Queen Elizabeth Hospital, Gateshead NE9 6SX, UK |
| John McLaughlin | NIHR IBD BioResource | Department of Gastroenterology, Northern Care Alliance NHS Foundation Trust, the hospital is still Salford Royal, Salford Royal Hospital, Salford, M6 8HD, UK |
| Simon McLaughlin | NIHR IBD BioResource | Royal Bournemouth Hospital, Bournemouth BH7 7DW, UK |
| Yin Miao | NIHR IBD BioResource | Ipswich Hospital, Ipswich IP4 5PD, UK |
| Gordon Moran | NIHR IBD BioResource | NIHR Nottingham Biomedical Research Centre, Nottingham, UK; Translational Medical Sciences, School of Medicine, Faculty of Medicine and Health Sciences, University of Nottingham, Nottingham, UK |
| Deborah Morris | NIHR IBD BioResource | Lister Hospital, Stevenage SG1 4AB, UK |
| Craig Mowat | UK IBDGC | Department of Gastroenterology, Ninewells Hospital, Dundee, Scotland, UK |
| Ajay Muddu | NIHR IBD BioResource | Scarborough Hospital, Woodlands Drive , Scarborough YO12 6QL, UK |
| Rafeeq Muhammed | NIHR IBD BioResource | Birmingham Women's and Children's hospital, Birmingham B15 2TG, UK |
| Charles Murray | NIHR IBD BioResource | Royal Free Hospital, London, NW3 2QQ, UK |
| William Newman | UK IBDGC | Manchester University NHS Foundation Trust, University of Manchester, UK |
| Chuka Nwokolo | NIHR IBD BioResource | University Hospitals Coventry & Warwickshire, Coventry, CV2 2DX, UK |
| Susan O'Sullivan | NIHR IBD BioResource | Peterborough City Hospital, Peterborough PE3 9GZ, UK |
| Arabis Oglesby | NIHR IBD BioResource | Dorset County Hospital, Dorset DT1 2JY, UK |
| Tim Orchard | NIHR IBD BioResource | Imperial College, London, UK |
| Nigel Ovington | NIHR IBD BioResource | NIHR BioResource, Cambridge University Hospitals NHS Foundation, Cambridge Biomedical Campus, Cambridge CB2 0QQ, UK |
| Joanne Palmer | NIHR IBD BioResource | Rotherham Hospital, Rotherham S60 2UD, UK |
| Simon Panter | NIHR IBD BioResource | South Tyneside NHS Foundation Trust, South Tyneside District Hospital, Tyne & Wear NE34 0PL, UK |
| Vinod Patel | NIHR IBD BioResource | Tameside and Glossop Integrated Care NHS Foundation Trust, Ashton Under Lyne, OL6 9RW, UK |
| Linda Patterson | NIHR IBD BioResource | North Tyneside General Hospital, North Shields NE29 8NH, UK |
| Anne Phillips | NIHR IBD BioResource | York Teaching Hospital (NHS) Foundation Trust, York YO31 8HE, UK |
| Kath Phillis | NIHR IBD BioResource | Chesterfield Royal Hospital NHS Foundation Trust, Chesterfield , S44 5BL, UK |
| Richard Pollok | NIHR IBD BioResource | Dept Gastroenterology, St Georges Foundation Trust NHS Hospitals, 2nd Floor Gosvenor Wing, London SW17 0QT, UK |
| Sam T. Powles | NIHR IBD BioResource | Torbay Hospital, Torquay TQ2 7AA, UK |
| Natalie Prescott | UK IBDGC | Department of Medical and Molecular Genetics, Guy’s Hospital, London, SE1 9RT |
| Monira Rahman | NIHR IBD BioResource | Surrey and Sussex Healthcare NHS Trust, East Surrey Hospital, Redhill RH1 5RH, UK |
| Arvind Ramadas | NIHR IBD BioResource | James Cook University Hospital, Middlesbrough TS4 3BW, UK |
| John Ramage | NIHR IBD BioResource | Basingstoke and North Hampshire Hospital, Basingstoke, RG24 9NA, UK |
| Subramaniam Ramakrishnan | NIHR IBD BioResource | Warrington & Halton hospitals NHS Foundation Trust, Warrington, WA5 1QG, UK |
| Venkatesh Ranganath | NIHR IBD BioResource | NIHR BioResource, Cambridge University Hospitals NHS Foundation, Cambridge Biomedical Campus, Cambridge CB2 0QQ, UK |
| Paul Rastall | NIHR IBD BioResource | Prince Philip Hospital, Llanelli SA14 8QF, UK |
| Elizabeth Renji | NIHR IBD BioResource | Alder Hey Children’s Hospital, Liverpool L14 5AB, UK |
| Dariush Sadigh | NIHR IBD BioResource | Whittington Hospital, London N19 5NF, UK |
| John Saunders | NIHR IBD BioResource | Royal United Hospital, Royal United Hospitals NHS Foundation Trust, Combe Park, Bath, Avon BA1 3NG, UK |
| Glyn Scott | NIHR IBD BioResource | William Harvey Hospital, Ashford TN24 0LZ, UK; Queen Elizabeth the Queen Mother Hospital, Margate CT9 4AN, UK |
| Christian Selinger | NIHR IBD BioResource | St. James’s University Hospital, Leeds LS9 7TF, UK |
| Sherif Shabana | NIHR IBD BioResource | Cumberland Infirmary, Carlisle CA2 7HY, UK |
| Rakesh Shah | NIHR IBD BioResource | Broomfield Hospital, Chelmsford CM1 7ET, UK |
| Dan Sharpstone | NIHR IBD BioResource | West Suffolk NHS Foundation Trust, Bury St Edmunds IP332QZ, UK |
| Rasha Shawky | NIHR IBD BioResource, UK IBDGC | NIHR BioResource, Cambridge University Hospitals NHS Foundation, Cambridge Biomedical Campus, Cambridge CB2 0QQ, UK |
| Sophy Shedwell | NIHR IBD BioResource | Queen Elizabeth Hospital, King's Lynn PE30 4ET, UK |
| Richard Shenderey | NIHR IBD BioResource | Airedale General Hospital, Keighley BD20 6TD, UK |
| Achuth Shenoy | NIHR IBD BioResource | Colchester General Hospital, Colchester, CO4 5JL, UK |
| Alison Simmons | NIHR IBD BioResource | John Radcliffe Hospital, Oxford OX3 9DU, UK |
| Rachel Simpkins | NIHR IBD BioResource | Royal Bolton Hospital, Bolton, BL4 0JR, UK |
| Salil Singh | NIHR IBD BioResource | Royal Bolton Hospital, Bolton, BL4 0JR, UK |
| Ganesh Sivaji | NIHR IBD BioResource | Harrogate and District NHS Foundation Trust, Harrogate HG2 7SX, UK |
| Katherine Smith | NIHR IBD BioResource | Clinical Investigation and Research Unit, Level 10,Royal Alex Childrens County Hospital, Brighton, BN2 5BE, UK |
| Melissa Smith | NIHR IBD BioResource | Royal Surrey County Hospital, Guildford GU2 7XX, UK |
| Phil J Smith | NIHR IBD BioResource | Department of Gastroenterology, Royal Liverpool Hospital, Liverpool University Hospitals NHS Foundation Trust, Liverpool L7 8YE, UK |
| Thean Soon Chew | NIHR IBD BioResource | Sheffield Teaching Hospital, Sheffield S10 2JF, UK |
| Michael Sprakes | NIHR IBD BioResource | Pinderfields Hospital, Wakefield, WF1 4DG, UK |
| Helen Steed | NIHR IBD BioResource | New Cross Hospital of The Royal Wolverhampton NHS Trust, Wolverhampton, WV10 0QP, UK |
| Alan Steel | NIHR IBD BioResource | The Royal Liverpool University Hospital, Liverpool L7 8YE, UK |
| Kathy Stirrups | NIHR IBD BioResource | NIHR BioResource, Cambridge University Hospitals NHS Foundation, Cambridge Biomedical Campus, Cambridge CB2 0QQ, UK |
| Sreedhar Subramanian | NIHR IBD BioResource | Royal Liverpool & Broadgreen University Hospital, Liverpool L7 8XP, UK |
| Hartley Thomas | NIHR IBD BioResource, UK IBDGC | Manchester University NHS Foundation Trust, University of Manchester, UK |
| Iola Thomas | UK IBDGC | Ysbyty Gwynedd, Bangor LL57 2PW, UK |
| Judith Tidbury | NIHR IBD BioResource | C/O R&D, Polegate Ward, Eastbourne DGH, Kings Drive, Eastbourne, E. Sussex BN21 2UD, UK |
| Busiswa Titchmarsh | NIHR IBD BioResource | Department of Gastroenterology, Cambridge University Hospitals NHS Foundation Trust, Cambridge CB2 0QQ, UK |
| Philip Tombleson | UK IBDGC | Department of Medical and Molecular Genetics at King's College London, Guy's Hospital, London, SE1 9RT |
| Mark Tremelling | UK IBDGC | Gastroenterology Department, Norfolk and Norwich University Hospitals NHS Foundation Trust, Norwich, UK |
| Karen Tricker | UK IBDGC | Manchester University NHS Foundation Trust, University of Manchester, UK |
| Deven Vani | NIHR IBD BioResource | Pinderfields Hospital, Wakefield, WF1 4DG, UK |
| Ajay Verma | NIHR IBD BioResource | Kettering General Hospital NHS Foundation Trust, Kettering, NN16 8UZ, UK |
| Gareth Walker | NIHR IBD BioResource, UK IBDGC | Torbay Hospital, Torquay TQ2 7AA, UK |
| Sophie Warden | NIHR IBD BioResource | NIHR BioResource, Cambridge University Hospitals NHS Foundation, Cambridge Biomedical Campus, Cambridge CB2 0QQ, UK |
| Ben Warner | NIHR IBD BioResource | Darent Valley Hospital, Dartford DA2 8DA, UK |
| Emma Wesley | NIHR IBD BioResource | Musgrove Park Hospital, Taunton, Somerset, TA1 5DA, UK |
| Alan Wiles | NIHR IBD BioResource | The Queen Elizabeth Hospital Kings Lynn, King's Lynn PE30 4ET, UK |
| Horace Williams | NIHR IBD BioResource | St Mary's Hospital, London W2 1NY, UK |
| David Wilson | NIHR IBD BioResource, UK IBDGC | Great Western Hospitals NHS Foundation Trust Western General Hospital, UK |
| Matthias Zilbauer | NIHR IBD BioResource | Addenbrooke's Hospital & University Cambridge, Cambridge CB2 0QQ, UK |
