# Supplementary material
Source: Research Square preprint supplement (doi:10.21203/rs.3.rs-9569016/v1)
Supplement: Supplementary file 2 [file dd5bc9b3814ca34b91eb6b47.docx]

**Supplementary Note**

**Divergent effects of HLA-DQA1:p.Gln198Glu on Crohn's disease and ulcerative colitis disease trajectories**

**Supplementary Table 1 |** Association of HLA-DQA1:p.Gln198Glu with Crohn’s disease behaviour and ulcerative colitis disease severity in individual datasets and meta-analysis.

|  | **Case/Control** | **OR** | **95% CI** | **P_value** | **P_het** |
| --- | --- | --- | --- | --- | --- |
| **CD behaviour (B2/B3 v.s. B1), covariates: 4 PCs, sex, and disease location** | | | | | |
| **IBDBR** | 5,022/8,537 | 1.12 | 1.06-1.18 | 2.38x10-5 | NA |
| **UKIBDGC - dataset 1** | 748/537 | 1.29 | 1.07-1.57 | 8.90x10-3 |
| **UKIBDGC - dataset 3** | 1,499/2,615 | 1.23 | 1.11-1.36 | 1.16x10-4 |
| **Meta-analysis** | 7,269/11,689 | 1.15 | 1.10-1.20 | 2.41x10-9 | 1.39x10-1 |
| **UC severity (severe v.s. mild), covariates: 4 PCs and sex** | | | | | |
| **IBDBR** | 7,604/3,475 | 0.84 | 0.79-0.89 | 2.64x10-8 | NA |
| **UKIBDGC - dataset 2** | 282/347 | 0.50 | 0.37-0.67 | 5.44x10-6 |
| **UKIBDGC - dataset 3** | 443/570 | 0.76 | 0.61-0.94 | 1.17x10-2 |
| **Meta-analysis** | 8,329/4,392 | 0.81 | 0.77-0.86 | 8.98x10-12 | 3.28x10-3 |
| **Meta-analysis (colectomy v.s. no colectomy)** | 1,286/11,060 | 0.69 | 0.62-0.76 | 6.74x10-12 | 1.33x10-1 |

The UK IBDGC cohort was genotyped across three independent batches; each genotyping array batch was therefore analysed separately prior to meta-analysis.


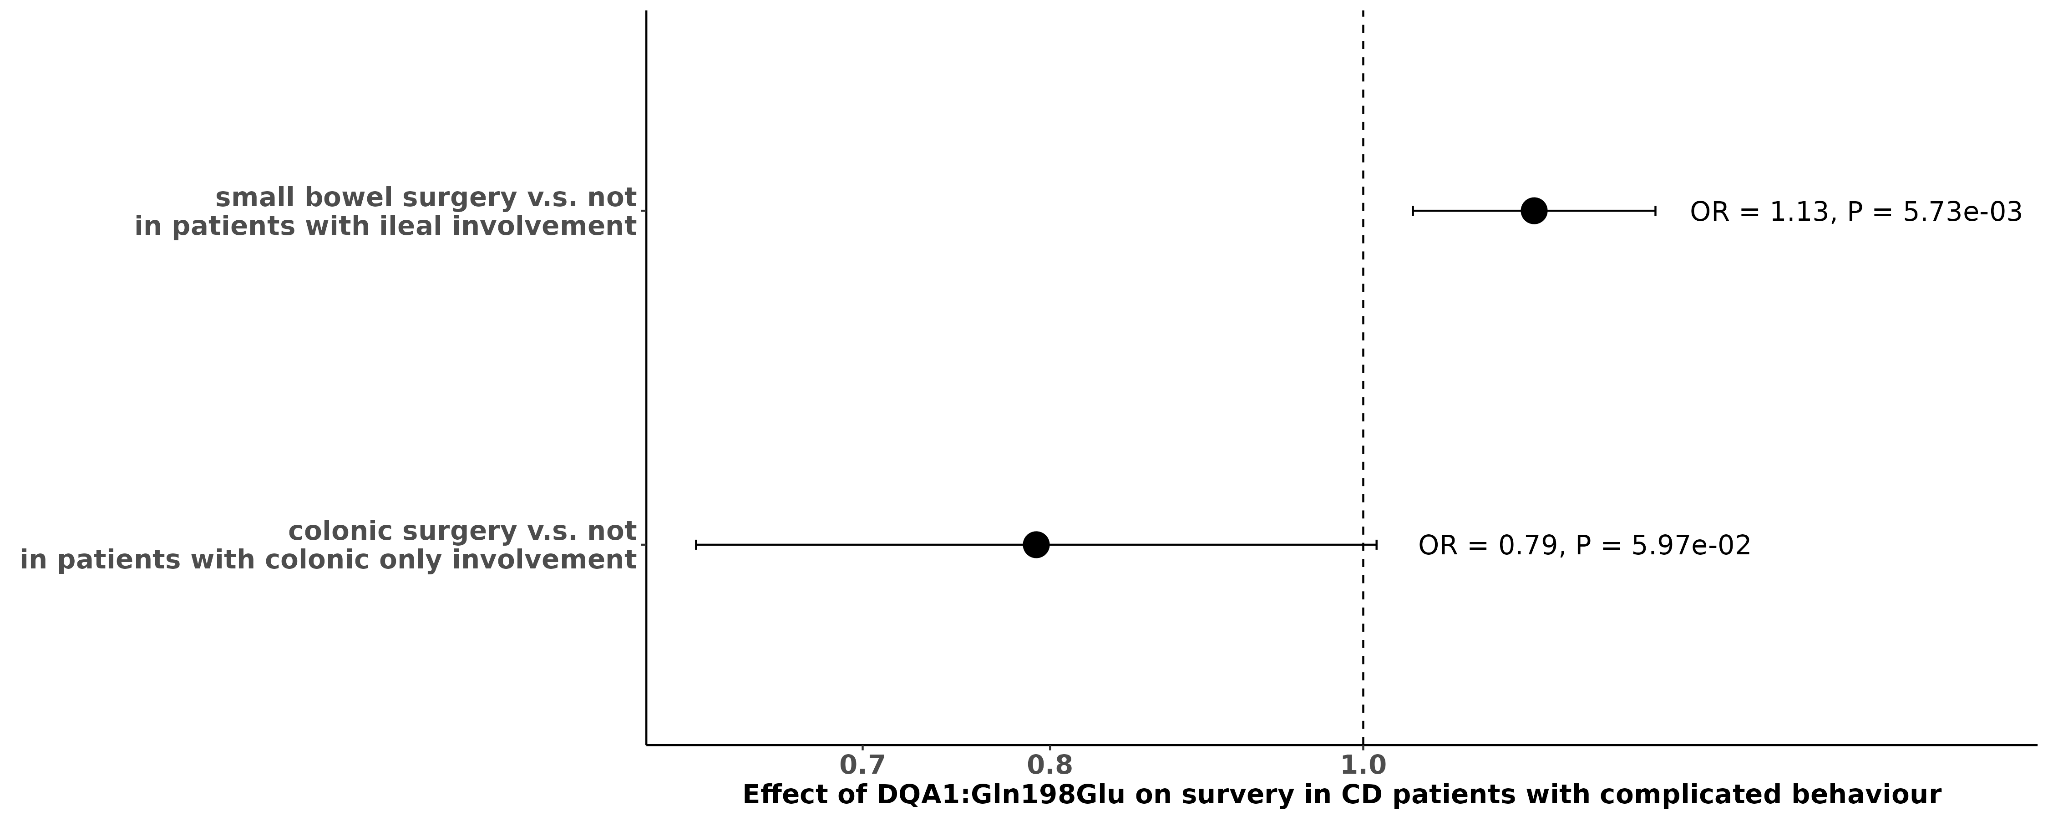


**Supplementary Figure 1 |** Association of DQA1:p.Gln198Glu with surgical requirement in CD patients with complicated behaviour (stricturing or penetrating). Small bowel surgery was assessed in patients with ileal involvement, whereas colonic surgery was assessed in patients with colonic-only disease.


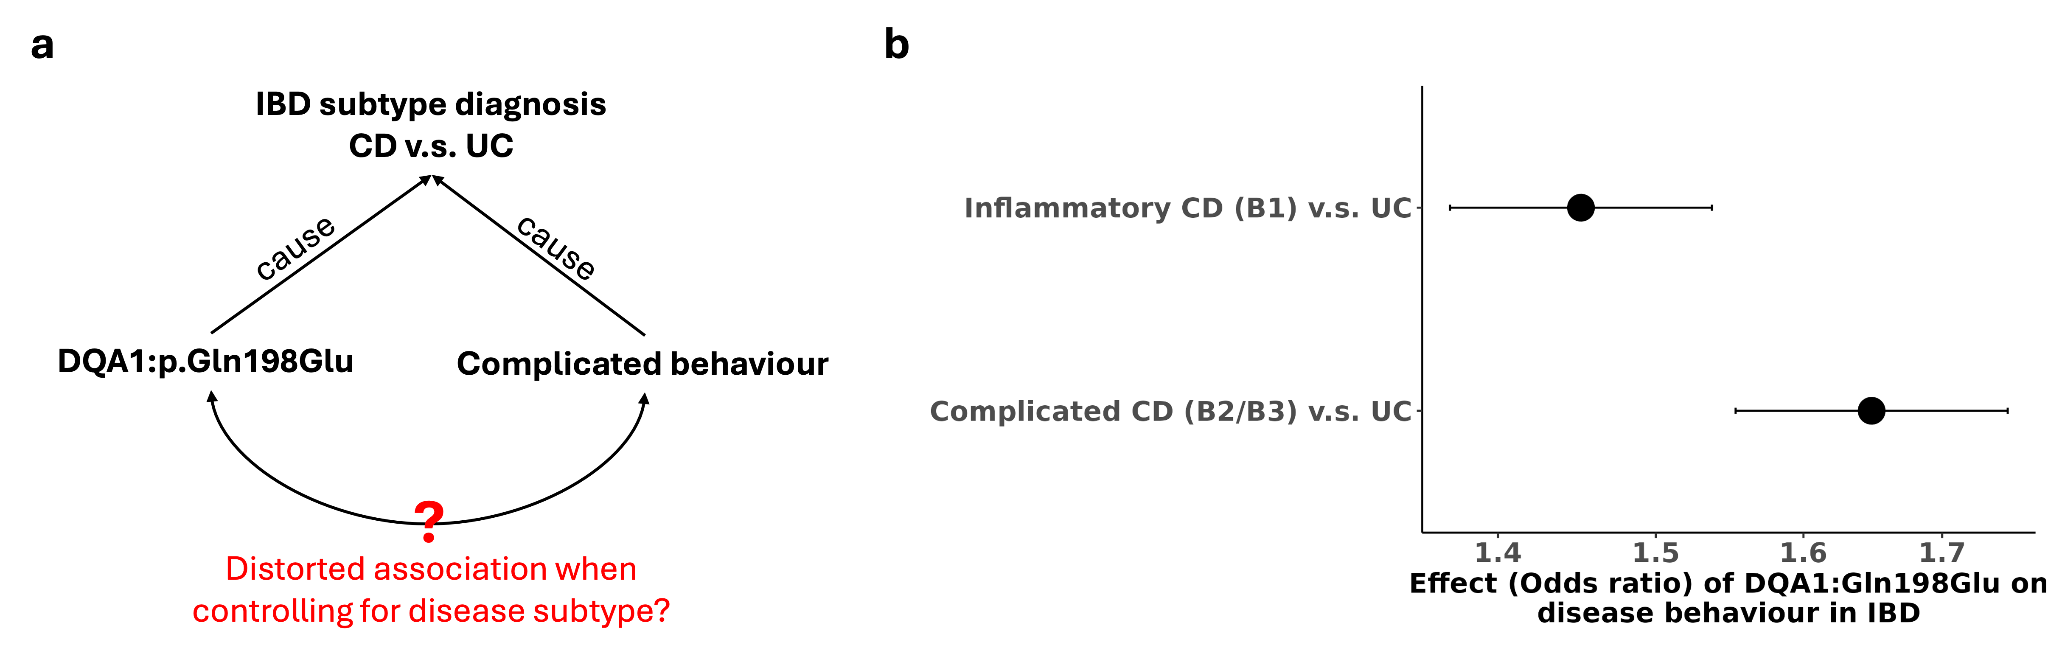


**Supplementary Figure 2 |** Effect of *DQA1:p.Gln198Glu* on disease behaviour in IBD. **a,** Causal diagram illustrating the potential collider bias introduced by the study design (selection bias) when evaluating separately the effect on CD and UC. **b,** Effect estimates for *DQA1:p.Gln198Glu* on disease behaviour across IBD from multinomial regression, with UC used as the reference group.


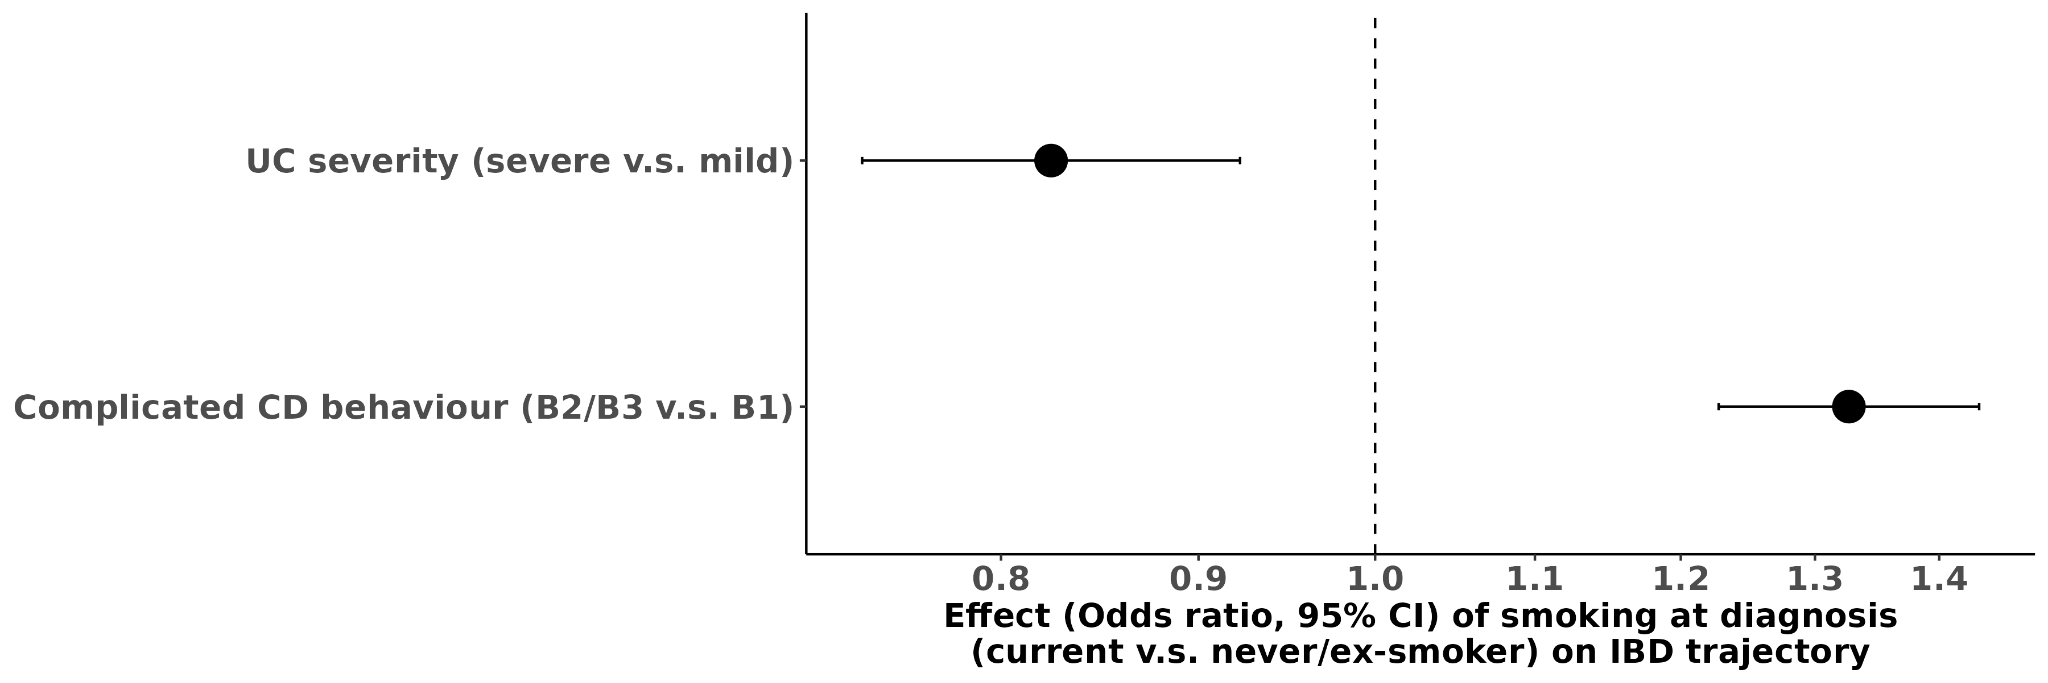


**Supplementary Figure 3 |** Effect of smoking at diagnosis on UC severity and complicated CD behaviour.
